# Supplementary material for: 'maskBAD' - a package to detect and remove Affymetrix probes with binding affinity differences
Source: Springer Nature journal article supplement (doi:10.1186/1471-2105-13-56), 2012-04-16
Supplement: 12859_2011_5358_MOESM1_ESM.pdf [file 12859_2011_5358_MOESM1_ESM.pdf]

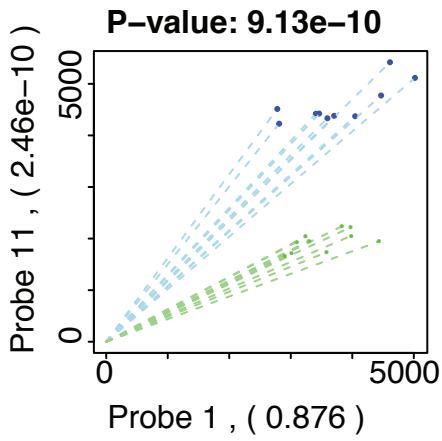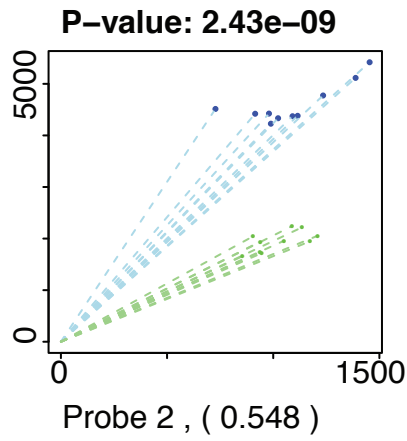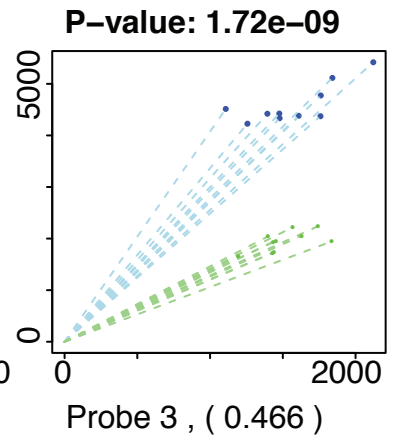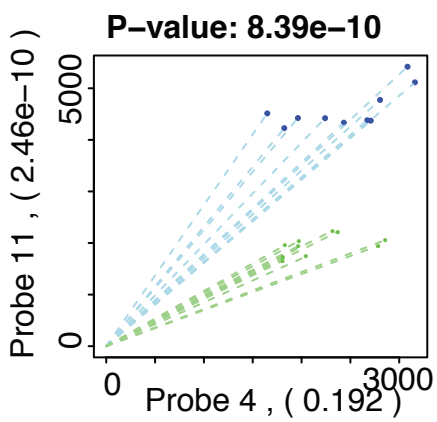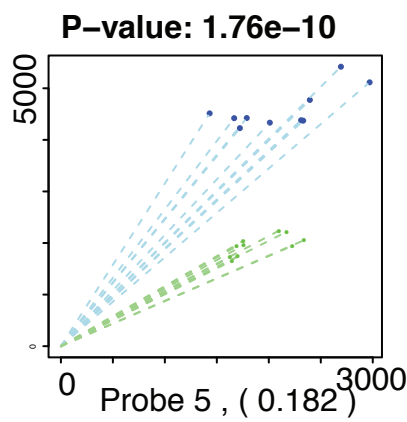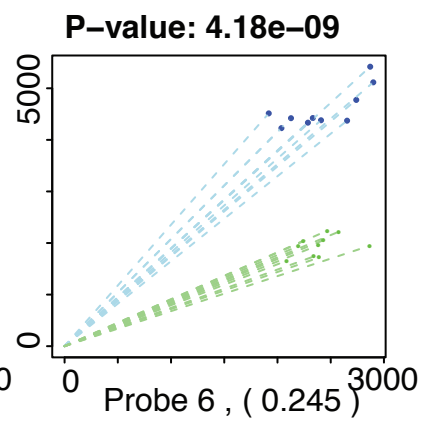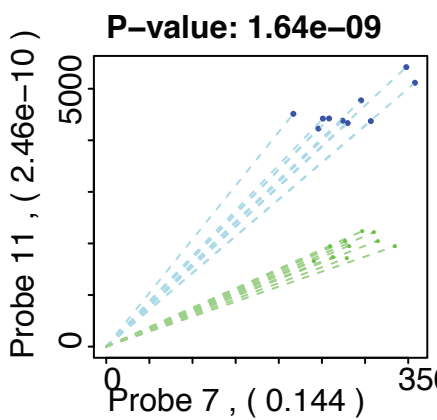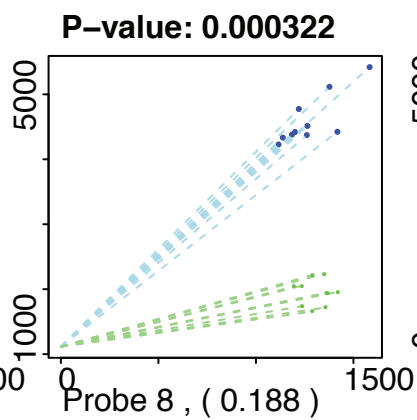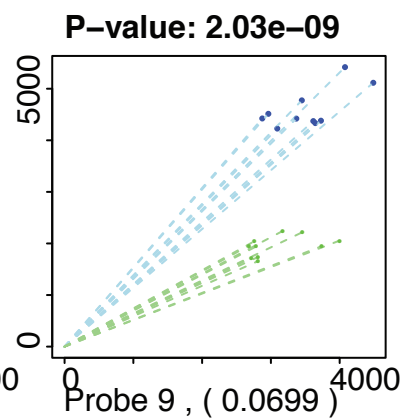

Samples from strains:

DBA/2J

C57BL/6NJ
