# Supplementary material for: 'maskBAD' - a package to detect and remove Affymetrix probes with binding affinity differences
Source: Springer Nature journal article supplement (doi:10.1186/1471-2105-13-56), 2012-04-16

Probes with polymorphisms detected as BAD

1  
0.9  
0.8  
0.7  
0.6

0 0.2 0.4 0.6 0.8 1

Probes without known polymorphisms detected as BAD

- maskBAD 10 individuals
- · · maskBAD 4 individuals
- SNEP 4 individuals
- · · SNEP 10 individuals

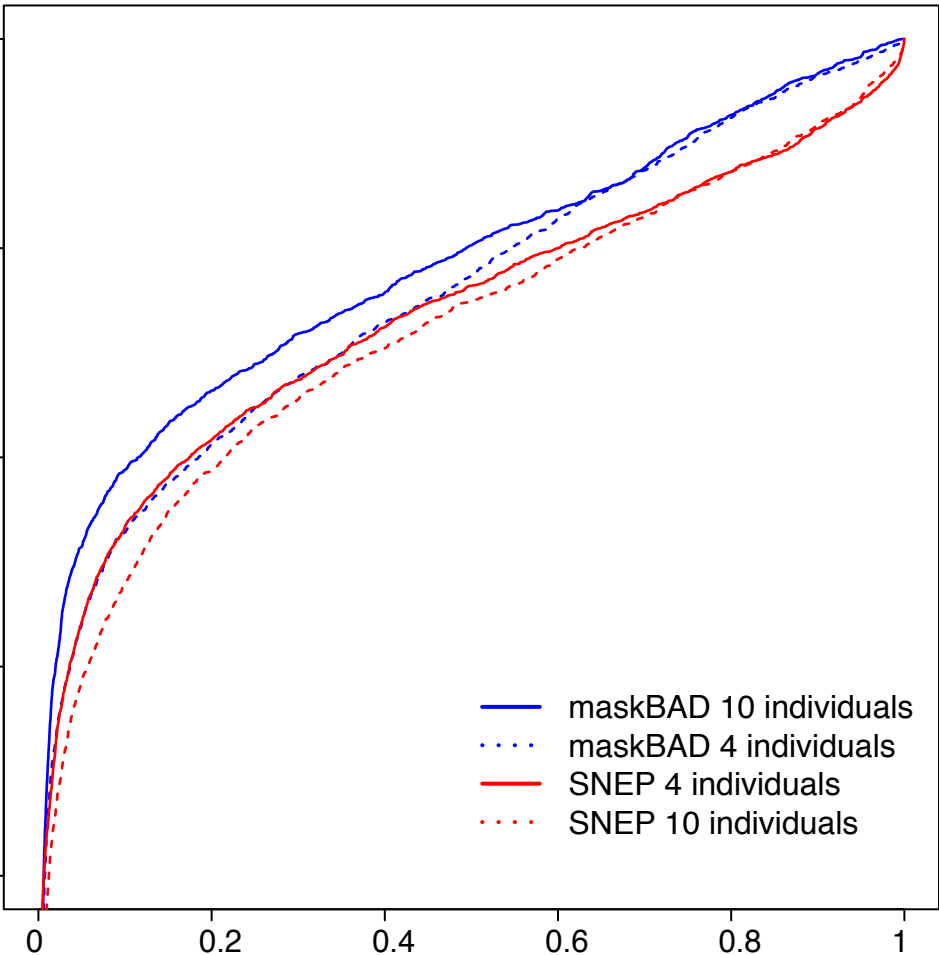

Supplement: 12859_2011_5358_MOESM5_ESM.pdf [file 12859_2011_5358_MOESM5_ESM.pdf]
