# Supplementary material for: 'maskBAD' - a package to detect and remove Affymetrix probes with binding affinity differences
Source: Springer Nature journal article supplement (doi:10.1186/1471-2105-13-56), 2012-04-16
Supplement: 12859_2011_5358_MOESM6_ESM.pdf [file 12859_2011_5358_MOESM6_ESM.pdf]

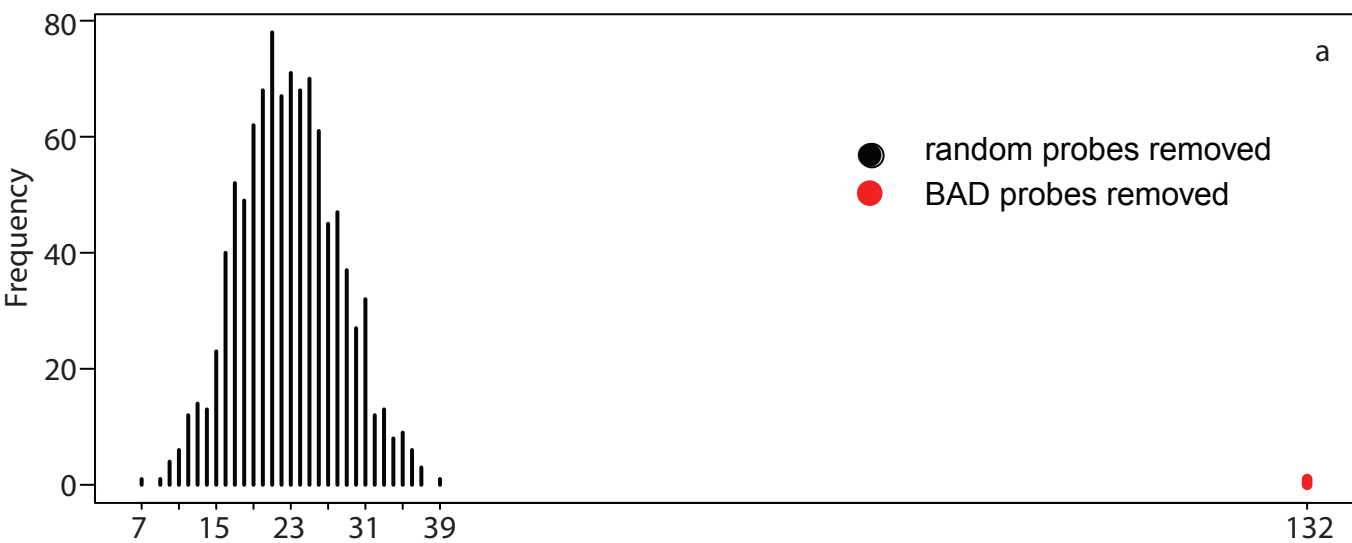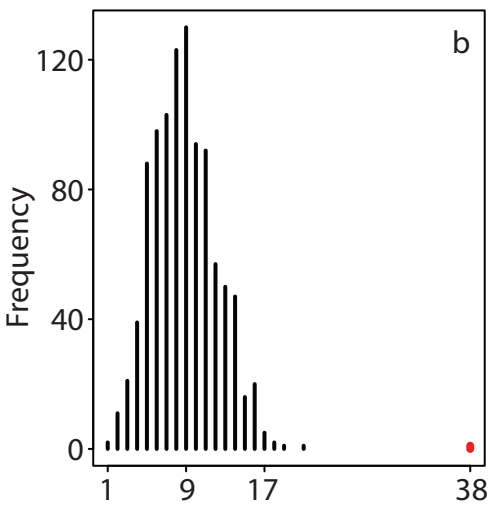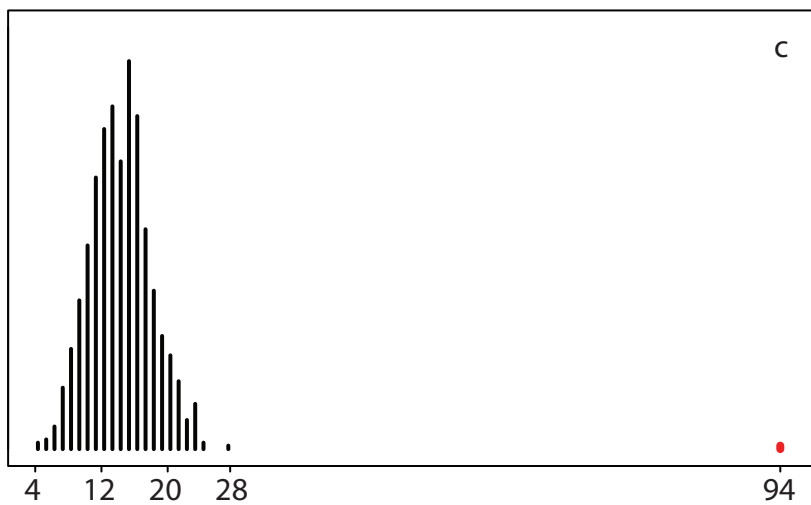

Number of probe sets changing DE status
